# Supplementary material
Source: PubMed Central journal article supplement (PMC3304532)

# Distribution of Gestational Age

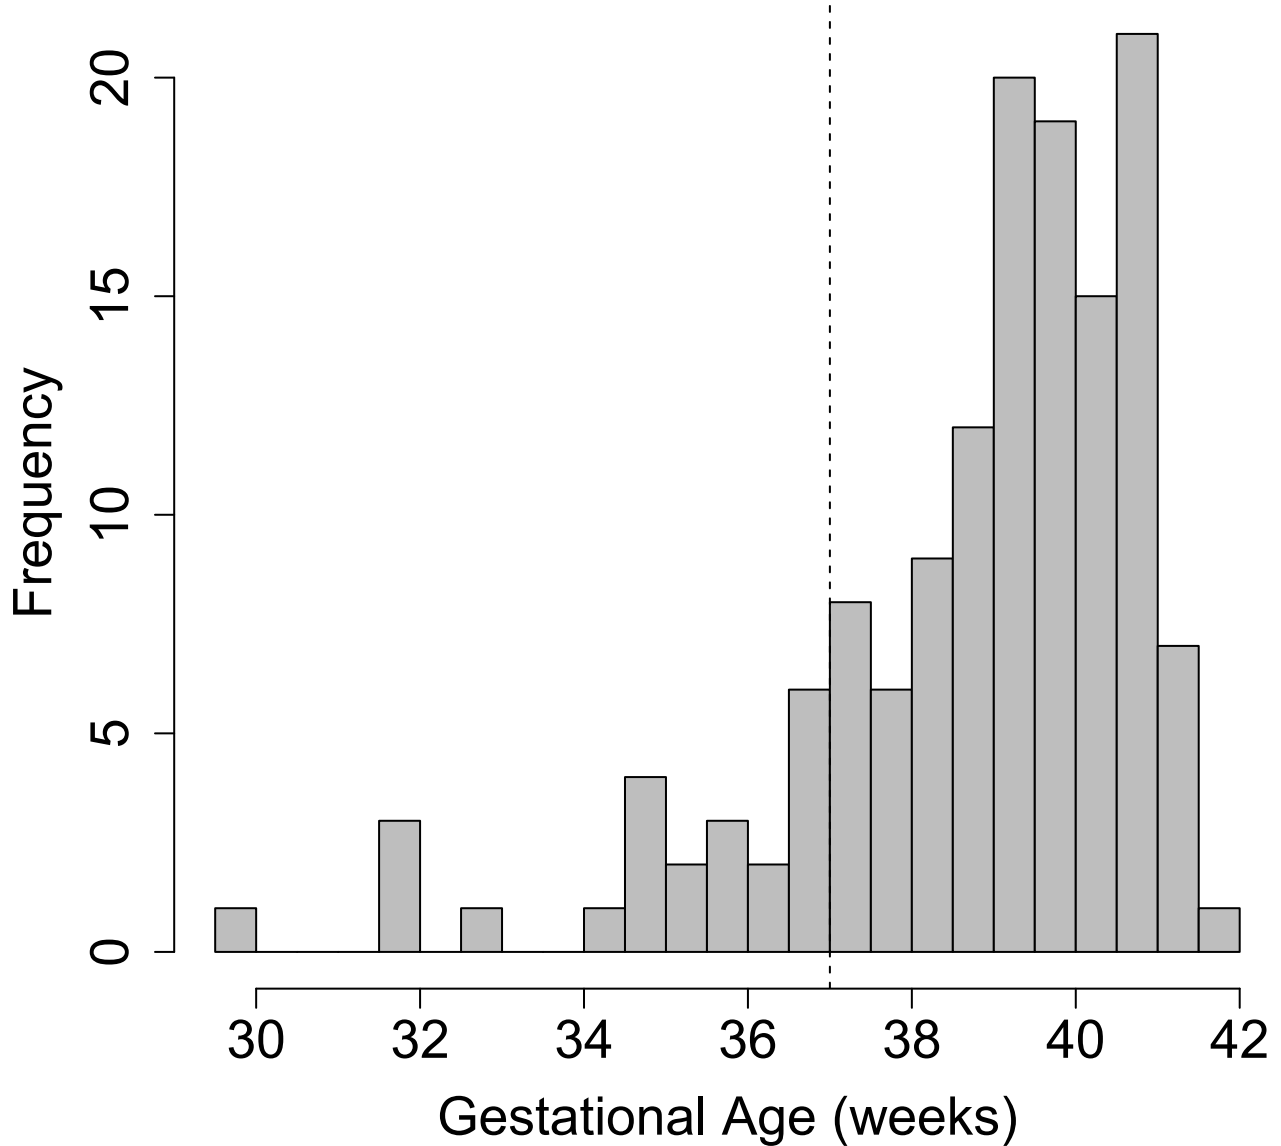

Supplement: supp_dyr237_ije-2011-10-0976-File006.pdf [file supp_dyr237_ije-2011-10-0976-File006.pdf]

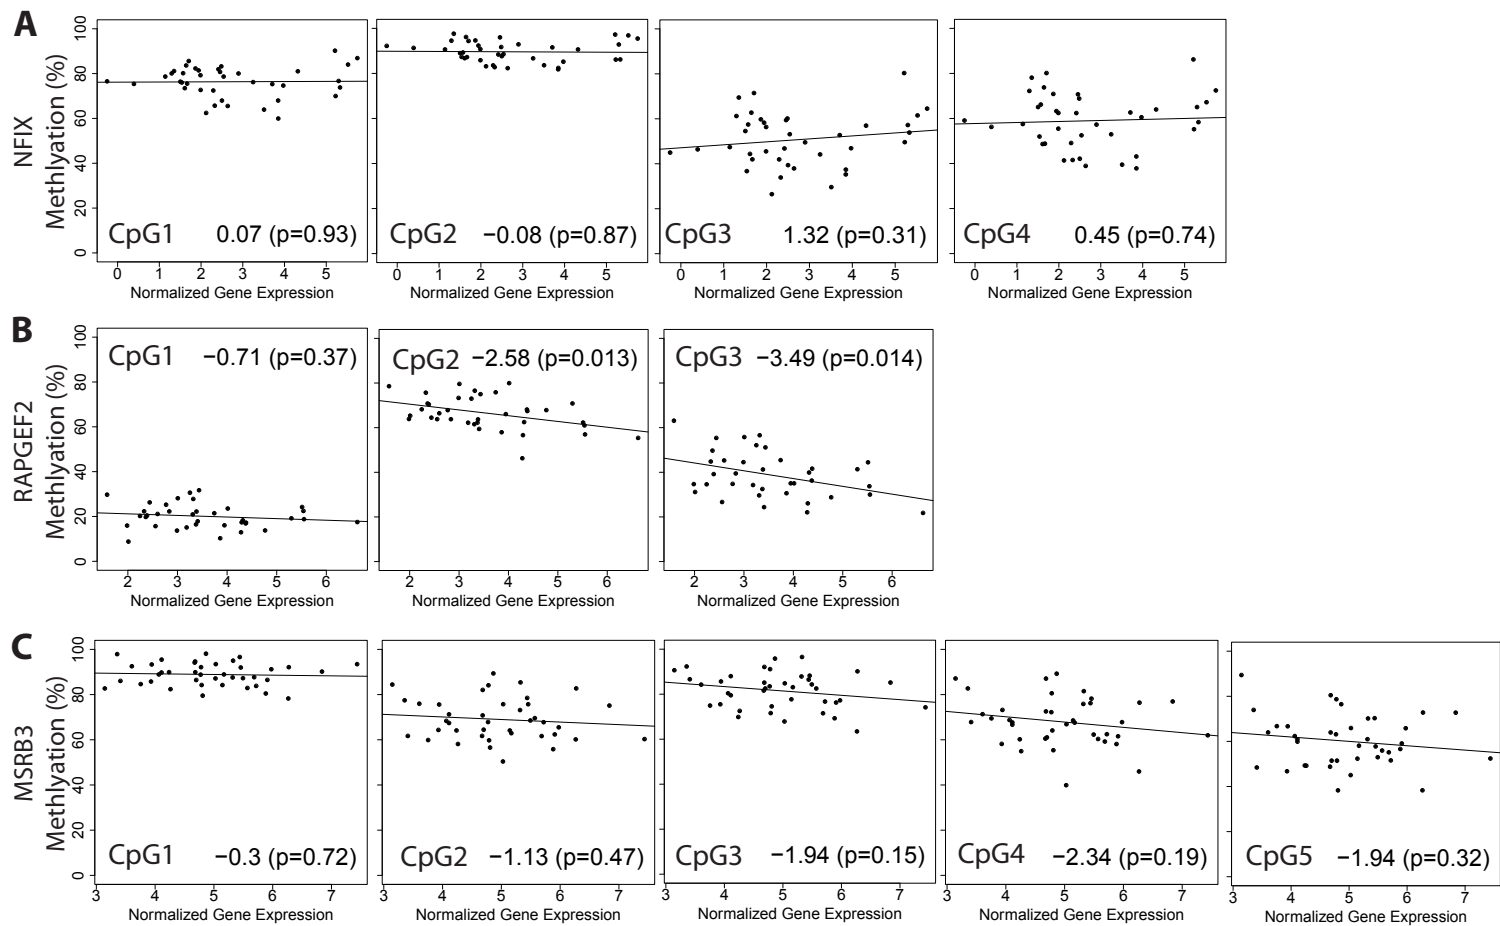

Supplement: supp_dyr237_ije-2011-10-0976-File007.pdf [file supp_dyr237_ije-2011-10-0976-File007.pdf]

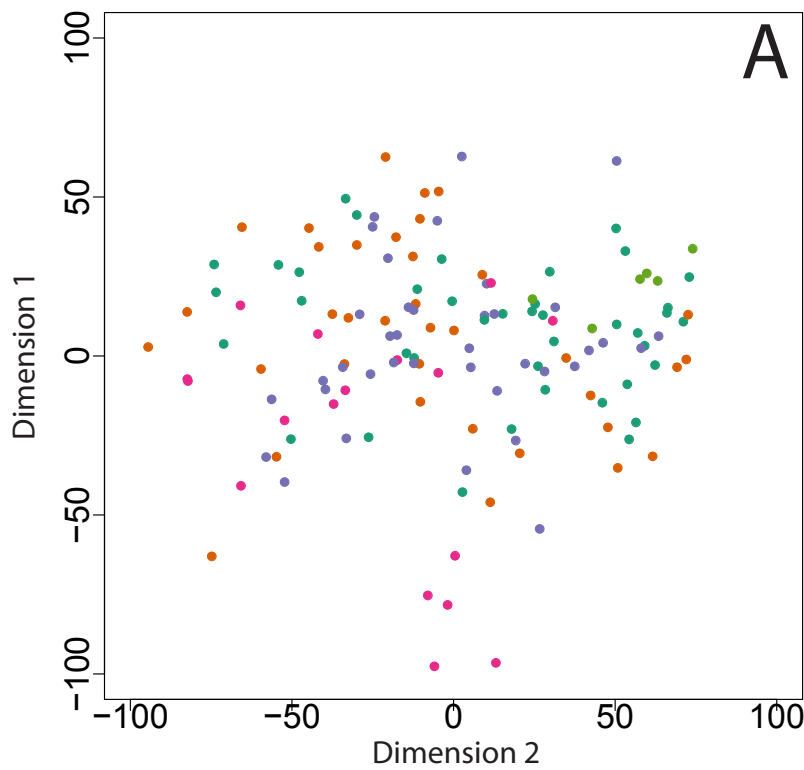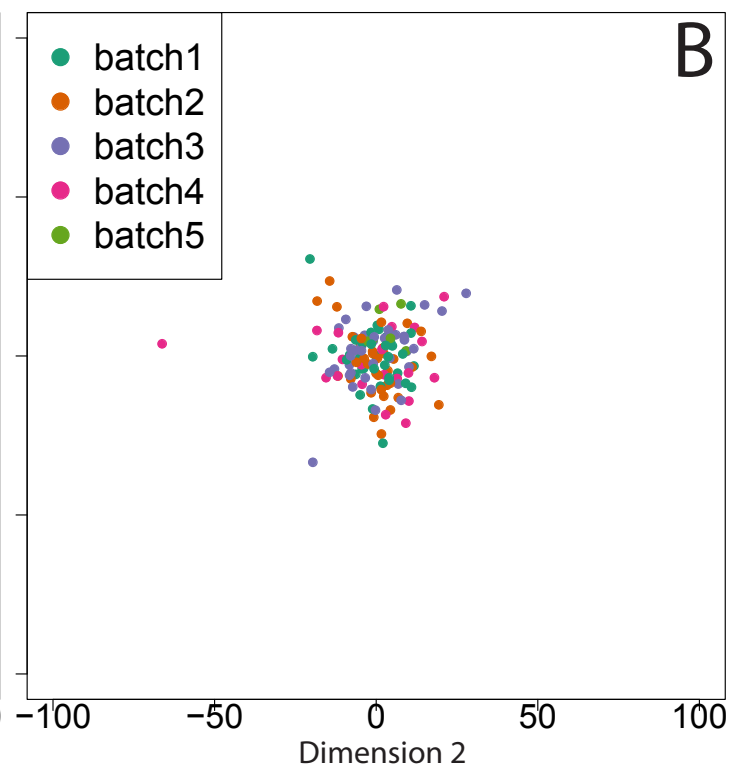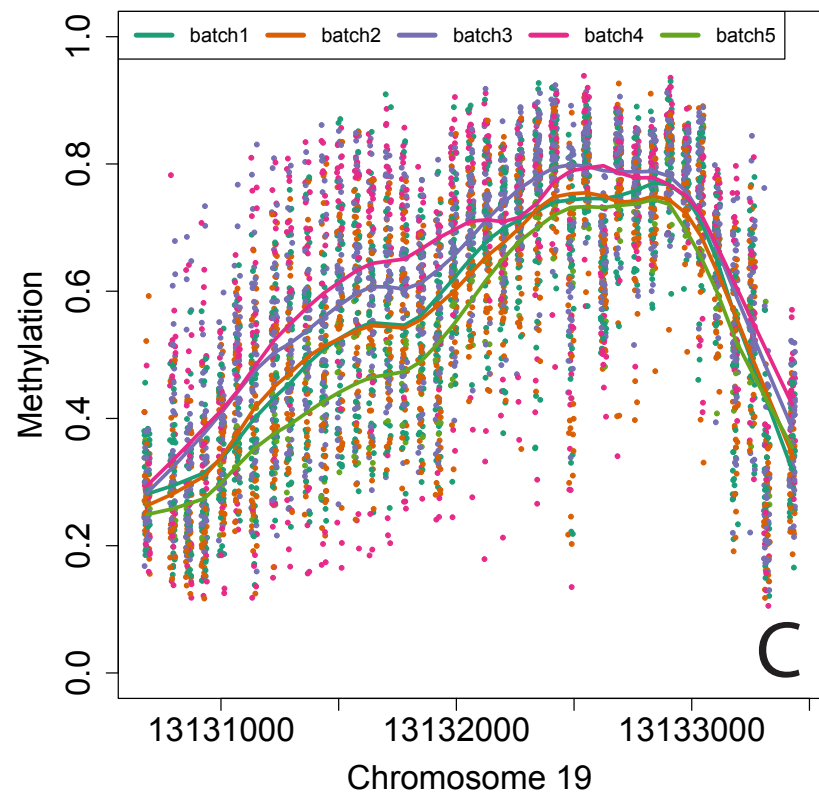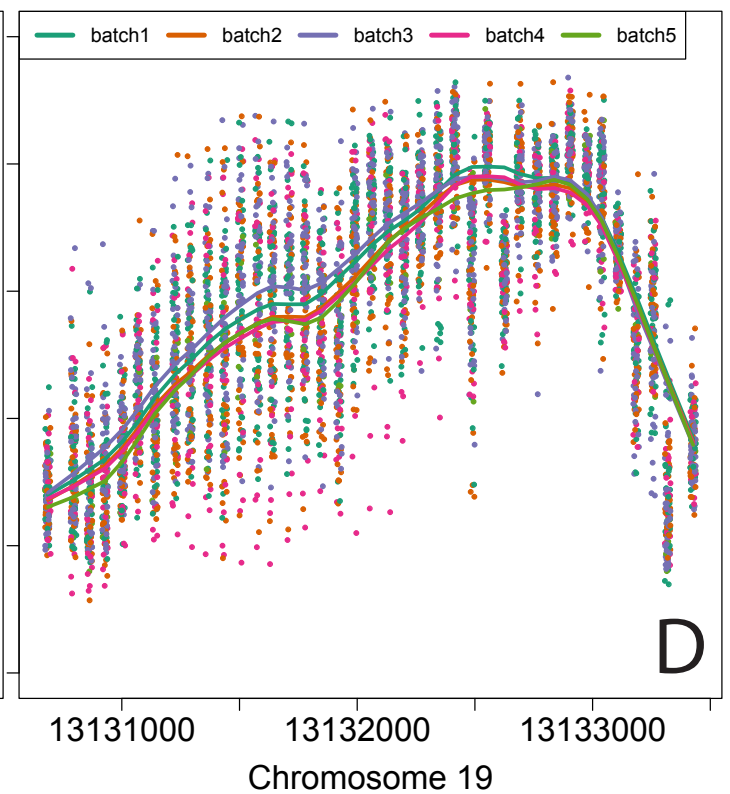

Supplement: supp_dyr237_ije-2011-10-0976-File008.pdf [file supp_dyr237_ije-2011-10-0976-File008.pdf]
